# Supplementary material for: Mechanism of supported Ru3Sn7 nanocluster-catalyzed selective hydrogenation of coconut oil to fatty alcohols
Source: Royal Society of Chemistry journal article supplement (doi:10.1039/c8cy00037a), 2018-01-01
Supplement: c8cy00037a1.pdf [file c8cy00037a1.pdf]

## Supporting Information

### Mechanism in Supported Ru<sub>3</sub>Sn<sub>7</sub> Nanoclusters Catalyzed Selective

### Hydrogenation of Coconut Oil to Fatty Alcohols

Zhicheng Luo<sup>1a</sup>, Qiming Bing<sup>1b</sup>, Jiechen Kong<sup>a</sup>, Jing-yao Liu<sup>b\*</sup>, Chen Zhao<sup>a\*</sup>

<sup>a</sup> Shanghai Key Laboratory of Green Chemistry and Chemical Processes, School of Chemistry and Molecular Engineering, East China Normal University, Shanghai, 200062, China

E-mail: czhao@chem.ecnu.edu.cn (C. Zhao)

<sup>b</sup> Laboratory of Theoretical and Computational Chemistry, Institute of Theoretical Chemistry, Jilin University, Changchun 130023, China.

Email: l jy121@jlu.edu.cn (J. Liu)

<sup>1</sup> Two authors contribute equally to the work

## Experimental Section

### Chemicals

Coconut Oil (Sinopharm, AR), *n*-dodecane (Sinopharm, > 98% GC assay), Stearic acids (Sinopharm, AR), Stearyl alcohol (Sinopharm, CP), Palmitic acid (Sinopharm, AR), Myristic acid (Sinopharm, CP, >98%), Lauric acid (Sinopharm, >99%), Butyric acid (Sinopharm, >99.5%), Propionic acid (Sinopharm, AR), SiO<sub>2</sub> (Shanghai maikun Co.), Pd(NO<sub>3</sub>)<sub>2</sub> (J&K, AR), SnCl<sub>4</sub>·5H<sub>2</sub>O (Sinopharm, AR), Co(NO<sub>3</sub>)<sub>2</sub>·6H<sub>2</sub>O (Sinopharm, AR), Ni(NO<sub>3</sub>)<sub>2</sub>·6H<sub>2</sub>O (Sinopharm, AR), RuCl<sub>3</sub>·3H<sub>2</sub>O (J&K, AR), PtCl<sub>4</sub> (J&K, AR), Air, H<sub>2</sub> and N<sub>2</sub> gases (99.999 vol.%) were supplied by Shanghai Pujiang Specialty Gases Co., Ltd.

### Computational Methods

First-principles spin-polarized density functional theory (DFT) calculations were performed using the Vienna ab initio Simulation Package (VASP) <sup>[1]</sup>. The projector augmented wave (PAW) method <sup>[2, 3]</sup> was adopted to describe the electron-ion interactions, and generalized gradient approximation with the Perdew-Burke-Ernzerhof approach (GGA-PBE) <sup>[4]</sup> was applied to describe the nonlocal exchange correlation energy. An energy cutoff of 400 eV was used in all calculations.

The optimized bulk geometries of Ru<sub>2</sub>Sn<sub>3</sub> and Ru<sub>3</sub>Sn<sub>7</sub> alloys were calculated based on the experimental crystal structure data <sup>[5, 6]</sup>. For structure optimization, the Brillouin zone was sampled using (5×5×5) Monkhorst-Pack (MP) k-points grid. The structures were fully relaxed with respect to the lattice constants and atomic positions until the forces exerted on each atom converged to 0.01 eV/Å. The optimized structures of Ru<sub>2</sub>Sn<sub>3</sub> and Ru<sub>3</sub>Sn<sub>7</sub> alloys were in good agreement with the experimental results for the differences of lattice constants being less than 1%. The (1×1) slab models of (100), (110) and (111) crystal surfaces of Ru<sub>3</sub>Sn<sub>7</sub> with the thickness of five atom layers were built based on the optimized Ru<sub>3</sub>Sn<sub>7</sub> bulk structure. In surface optimizations, the MP k-points grid was sampled as (5×5×1) with the same convergence criterions of the bulk calculations. A vacuum region of 15Å was employed along the perpendicular direction of the surfaces to avoid the interactions

between the periodic images. The transition states (TS) were located with the climbing-image nudged elastic band (CI-NEB) method and were confirmed by the vibrational analysis. The adsorption energy ( $E_{\text{ads}}$ ) was defined as:

$$E_{\text{ads}} = E_{\text{adsorbate-surface}} - E_{\text{surface}} - E_{\text{adsorbate}}$$

wherein  $E_{\text{adsorbate}}$ ,  $E_{\text{surface}}$ , and  $E_{\text{adsorbate-surface}}$  represent the total energy of the adsorbate in gas phase, the surface model, and the surface with the adsorbate, respectively. The interaction energy (denoted as  $E_{\text{inter}}$ ), which was defined as the difference between the energies of the coadsorbed structure and the infinite separation state, was also considered.

The formation energies ( $E_{\text{form}}$ ) of  $\text{Ru}_1\text{Sn}_2$ ,  $\text{Ru}_2\text{Sn}_3$  and  $\text{Ru}_3\text{Sn}_7$  alloys were calculated using the following formula:

$$E_{\text{form}} = E_{\text{RuSn}} - CE_{\text{Ru}} - (1 - C)E_{\text{Sn}}$$

where  $E_{\text{RuSn}}$  is the energy per atom of Ru-Sn alloy bulk unit cell,  $E_{\text{Ru}}$  and  $E_{\text{Sn}}$  are the energies per atom of pure metallic Ru and Sn bulk unit cell,  $C$  and  $(1-C)$  are the atom percentages of Ru and Sn in the alloy, respectively. According to this formula, the alloy with lower  $E_{\text{form}}$  value is more stable and preferred to form.

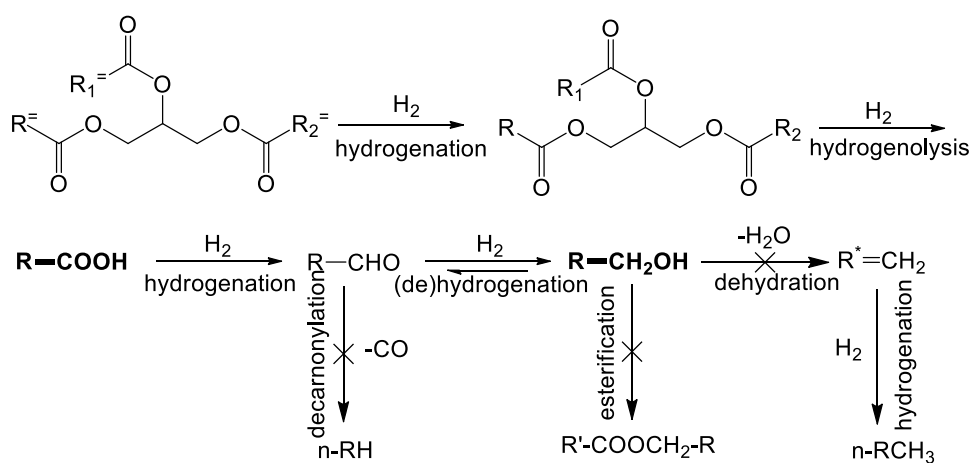

**Figure S1.** The reaction sequences for selective conversion of coconut oil to fatty alcohols.

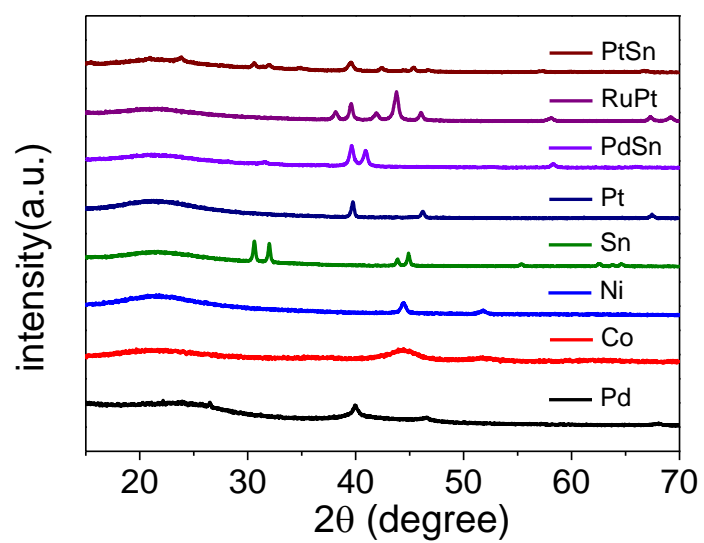

**Figure S2.** The XRD patterns of the supported metal catalysts on SiO<sub>2</sub> (metal loading: 5 wt%).

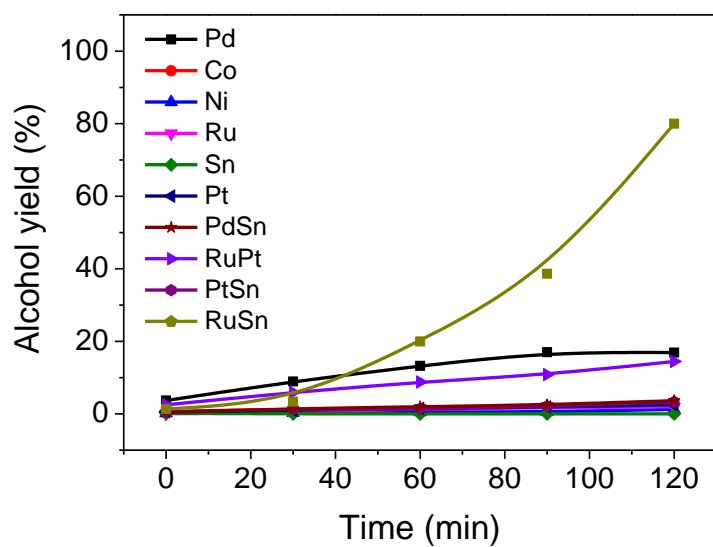

**Figure S3.** Kinetics curves of stearyl alcohol yields from stearic acid hydrogenation over different metal catalysts. Reaction conditions: Stearic acid (1.0 g), 5% M/SiO<sub>2</sub> (0.2 g), dodecane (80 mL), 240 °C, 4 MPa H<sub>2</sub>, stirring at 700 rpm.

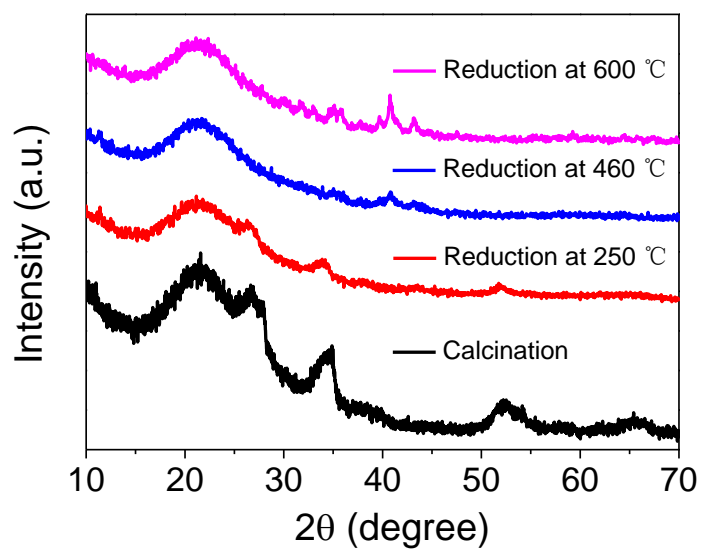

**Figure S4.** The XRD patterns of 1.5%Ru-4.5%Sn/SiO<sub>2</sub> catalysts prepared at different reduction temperatures.

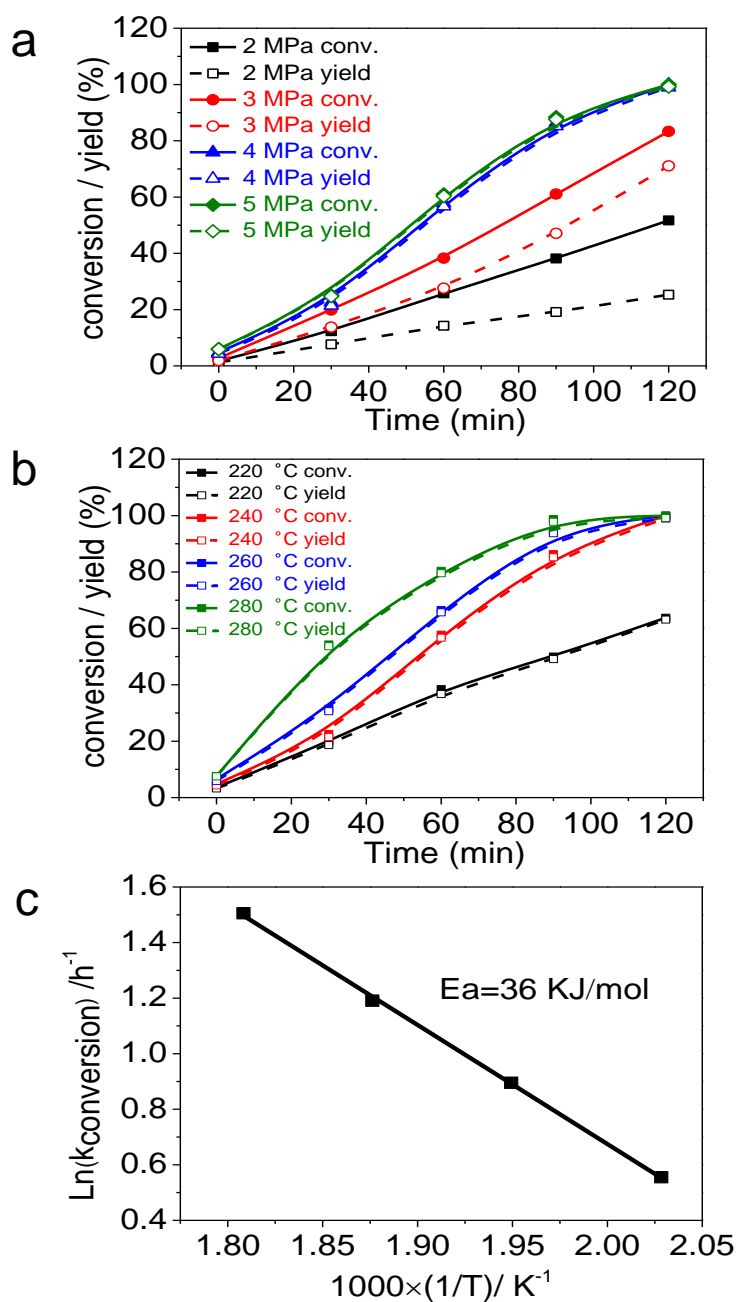

**Figure S5.** (a) Temperatures and (b) hydrogen pressures impact towards stearic acid conversion and product distributions. Reaction conditions: Stearic acid (1.0 g), catalyst (0.2 g), dodecane (80 mL), 240 °C, 4 MPa H<sub>2</sub>, stirring at 700 rpm.



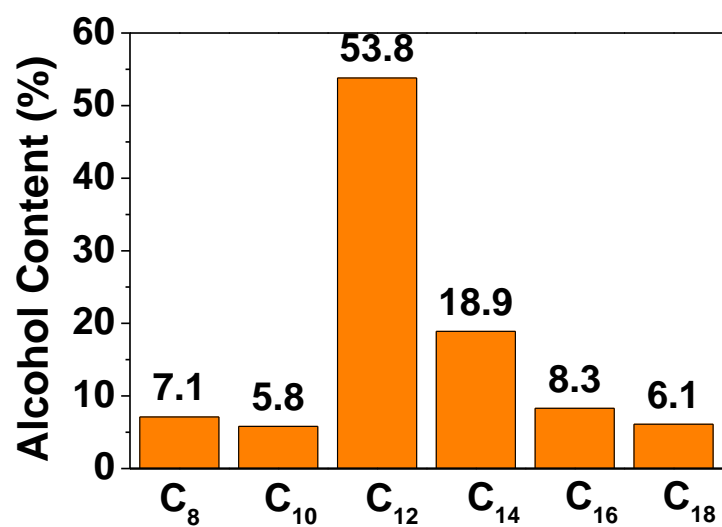

**Figure S6.** The fatty acid compositions in coconut oil raw material detected by transesterification with methanol. Reaction conditions: coconut oil (1.0 g), CaO (1 g), methanol (100 mL), 80 °C, 2 h.

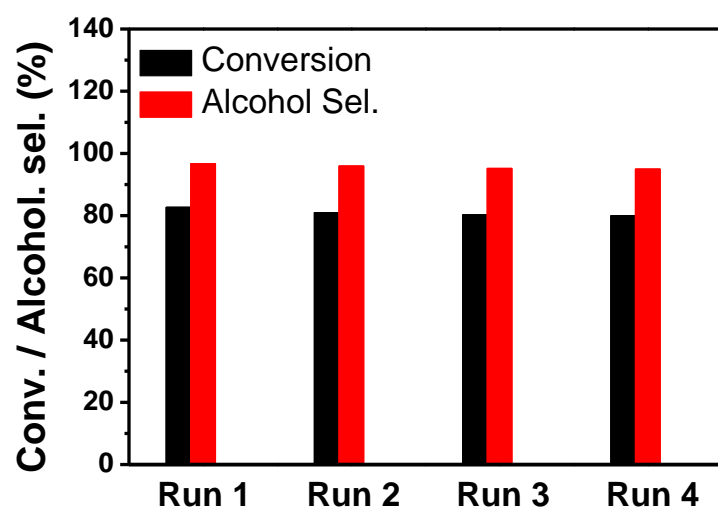

**Figure S7.** Coconut oil hydrogenation was tested on  $\text{Ru}_3\text{Sn}_7/\text{SiO}_2$  catalyst by four consecutive runs. Reaction conditions: Coconut oil (1.0 g), catalyst (0.2 g), dodecane (80 mL), 240 °C, 4 MPa  $\text{H}_2$ , stirring at 700 rpm.

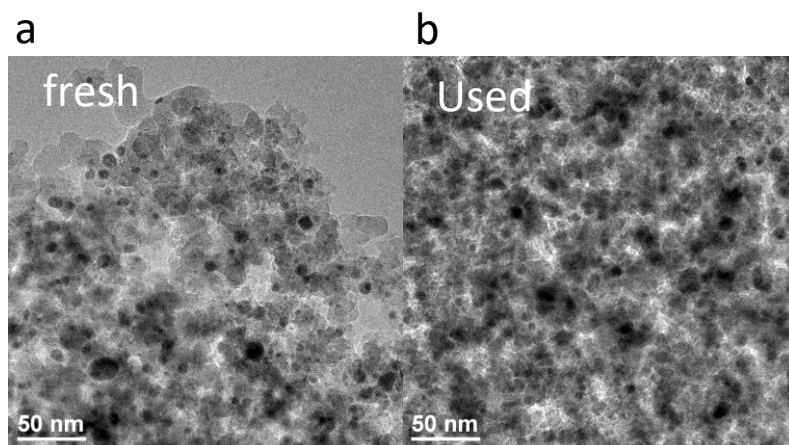

**Figure S8.** The TEM images of (a) fresh and (b) used Ru<sub>3</sub>Sn<sub>7</sub>/SiO<sub>2</sub> catalyst.

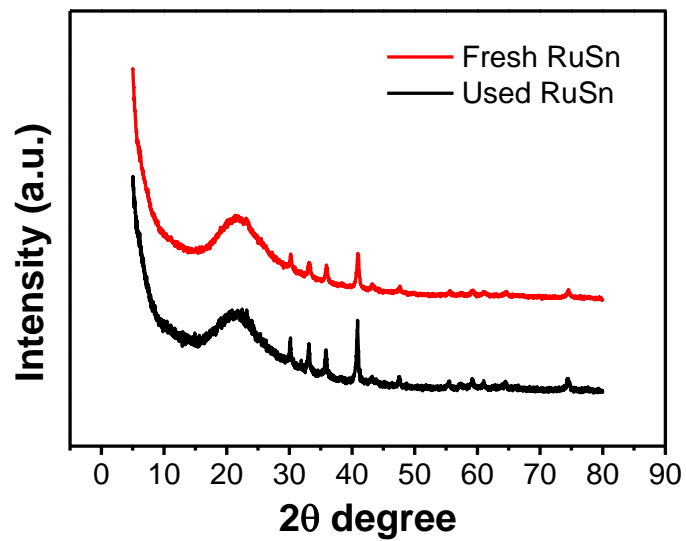

**Figure S9.** The XRD patterns of fresh and used  $\text{Ru}_3\text{Sn}_7/\text{SiO}_2$  catalyst.

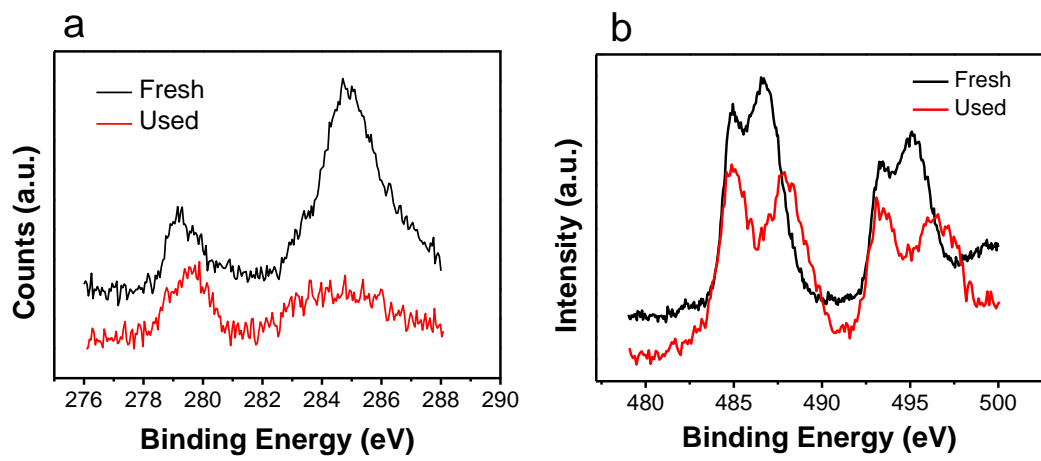

**Figure S10.** The XPS spectra of fresh and used Ru<sub>3</sub>Sn<sub>7</sub>/SiO<sub>2</sub> catalyst, (a) Ru 3d<sub>5/2</sub>; (b) Sn 3d<sub>5/2</sub>.

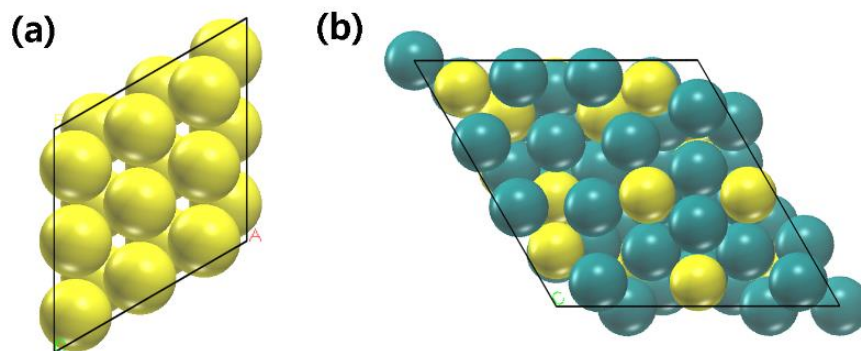

**Figure S11.** Optimized structure schemes of (a) Ru (0001) (b) Ru<sub>3</sub>Sn<sub>7</sub> (111) surfaces. Color scheme: yellow: Ru and cyan: Sn.

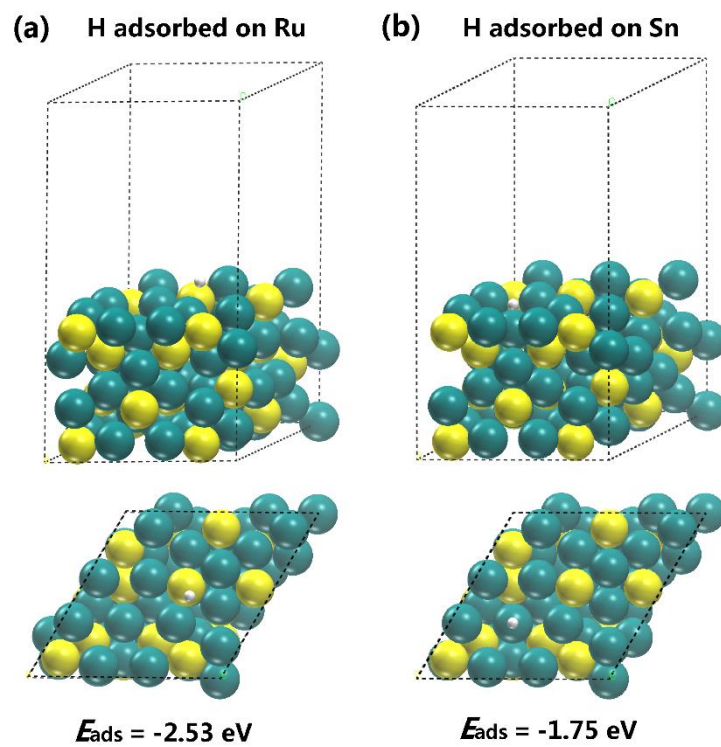

**Figure S12.** Most stable adsorption structures and adsorption energies of  $\text{H}^*$  species at the (a) Ru and (b) Sn site on  $\text{Ru}_3\text{Sn}_7$  (111) surfaces. Color scheme: yellow: Ru, cyan: Sn, and white: H.

**Table S1.** The Ru and Sn species information on various RuSn/SiO<sub>2</sub> catalysts detected by XPS.

| Metal loading<br>(wt%) | BE(eV)                   |                                         | Bulk atomic<br>compositions | Surface atomic<br>compositions    |
|------------------------|--------------------------|-----------------------------------------|-----------------------------|-----------------------------------|
|                        | Ru 3d5/2                 | Sn 3d5/2                                | Ru/Sn                       | Sn <sup>0</sup> /Sn <sup>δ+</sup> |
| Ru(1.5)                | 280.2 (Ru <sup>0</sup> ) |                                         | +∞                          | 0                                 |
| Sn(4.0)                |                          | 484.9 (Sn <sup>0</sup> )                | 0                           | 0.1172                            |
|                        |                          | 486.9 (SnO)                             |                             |                                   |
| Ru(1.5)                | 279.8 (Ru <sup>0</sup> ) |                                         | 0.85                        | 0.3825                            |
| Sn(1.5)                |                          | 485.3 (Sn <sup>0</sup> )<br>486.9 (SnO) |                             |                                   |
| Ru(1.5)                | 279.7 (Ru <sup>0</sup> ) |                                         | 0.43                        | 0.3817                            |
| Sn(3.0)                |                          | 485.2 (Sn <sup>0</sup> )<br>486.9 (SnO) |                             |                                   |
| Ru(1.5)                | 279.4 (Ru <sup>0</sup> ) |                                         | 0.32                        | 0.7991                            |
| Sn(4.0)                |                          | 485.1 (Sn <sup>0</sup> )<br>486.9 (SnO) |                             |                                   |
| Ru(1.5)                | 279.3 (Ru <sup>0</sup> ) |                                         | 0.21                        | 0.2211                            |
| Sn(6.0)                |                          | 485.1 (Sn <sup>0</sup> )<br>486.9 (SnO) |                             |                                   |
| Ru(1.5)                | 279.2 (Ru <sup>0</sup> ) |                                         | 0.17                        | 0.2667                            |
| Sn(7.5)                |                          | 485.1 (Sn <sup>0</sup> )<br>486.9 (SnO) |                             |                                   |
| Ru(1.5)                | 279.1 (Ru <sup>0</sup> ) |                                         | 0.13                        | 0.1431                            |
| Sn(9.5)                |                          | 485.0 (Sn <sup>0</sup> )<br>486.9 (SnO) |                             |                                   |



## Notes and references

- 1 G. Kresse, J. Furthmuller, *Phys. Rev. B.*, 1996, **54**, 11169-11186.
- 2 P. E. Blochl, *Phys. Rev. B.* 1994, **50**, 17953-17979.
- 3 G. Kresse, D. Joubert, *Phys. Rev. B.* 1999, **59**, 1758-1775.
- 4 J. P. Perdew, K. Burke, M. Ernzerhof, *Phys. Rev. Lett.* 1996, **77**, 3865-3868.
- 5 O. Schwomma, H. Nowotny, A. Wittmann, *Monatsh Chem.* 1964, **95**, 1538-1543.
- 6 E. Lars, L. Johanna, *Acta Cryst.* 2001, **57**, 85-86.
